# Supplementary material for: Global Analysis of the Cover-Management Factor for Soil Erosion Modeling
Source: MDPI journal article supplement (doi:10.3390/rs15112868), 2023-05-31
Supplement: s1 [file s1]

## Global analysis of the cover-management factor for soil erosion modeling

### Contents of this file

Figures S1 to S2 and Table S1

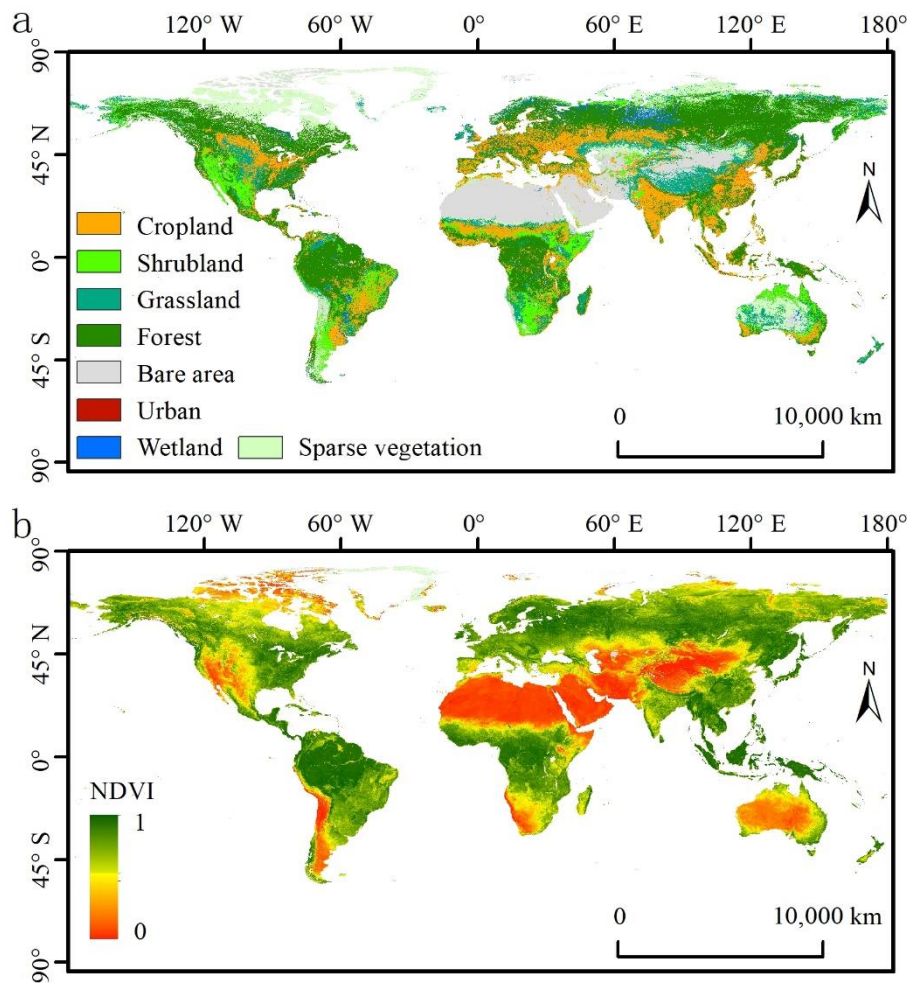

**Figure S1** Spatial distribution of landcover and NDVI of the year 2015. (a) the landcover from ESA CCI-LC; (b) the NDVI from Global Inventory Modeling and Mapping Studies (GIMMS).

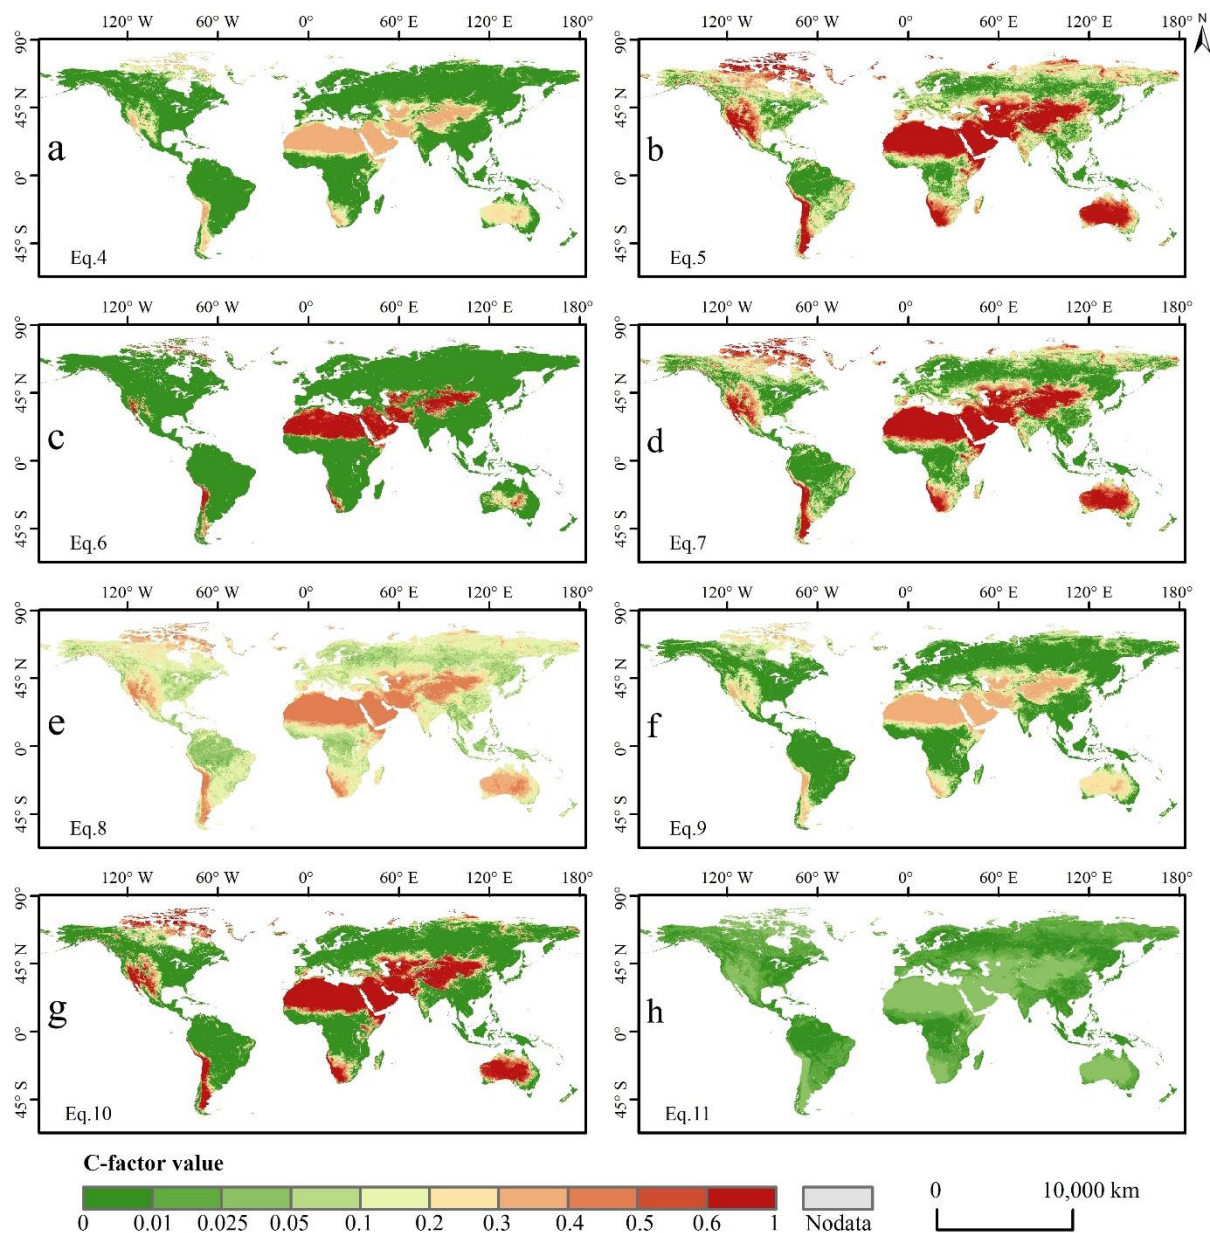

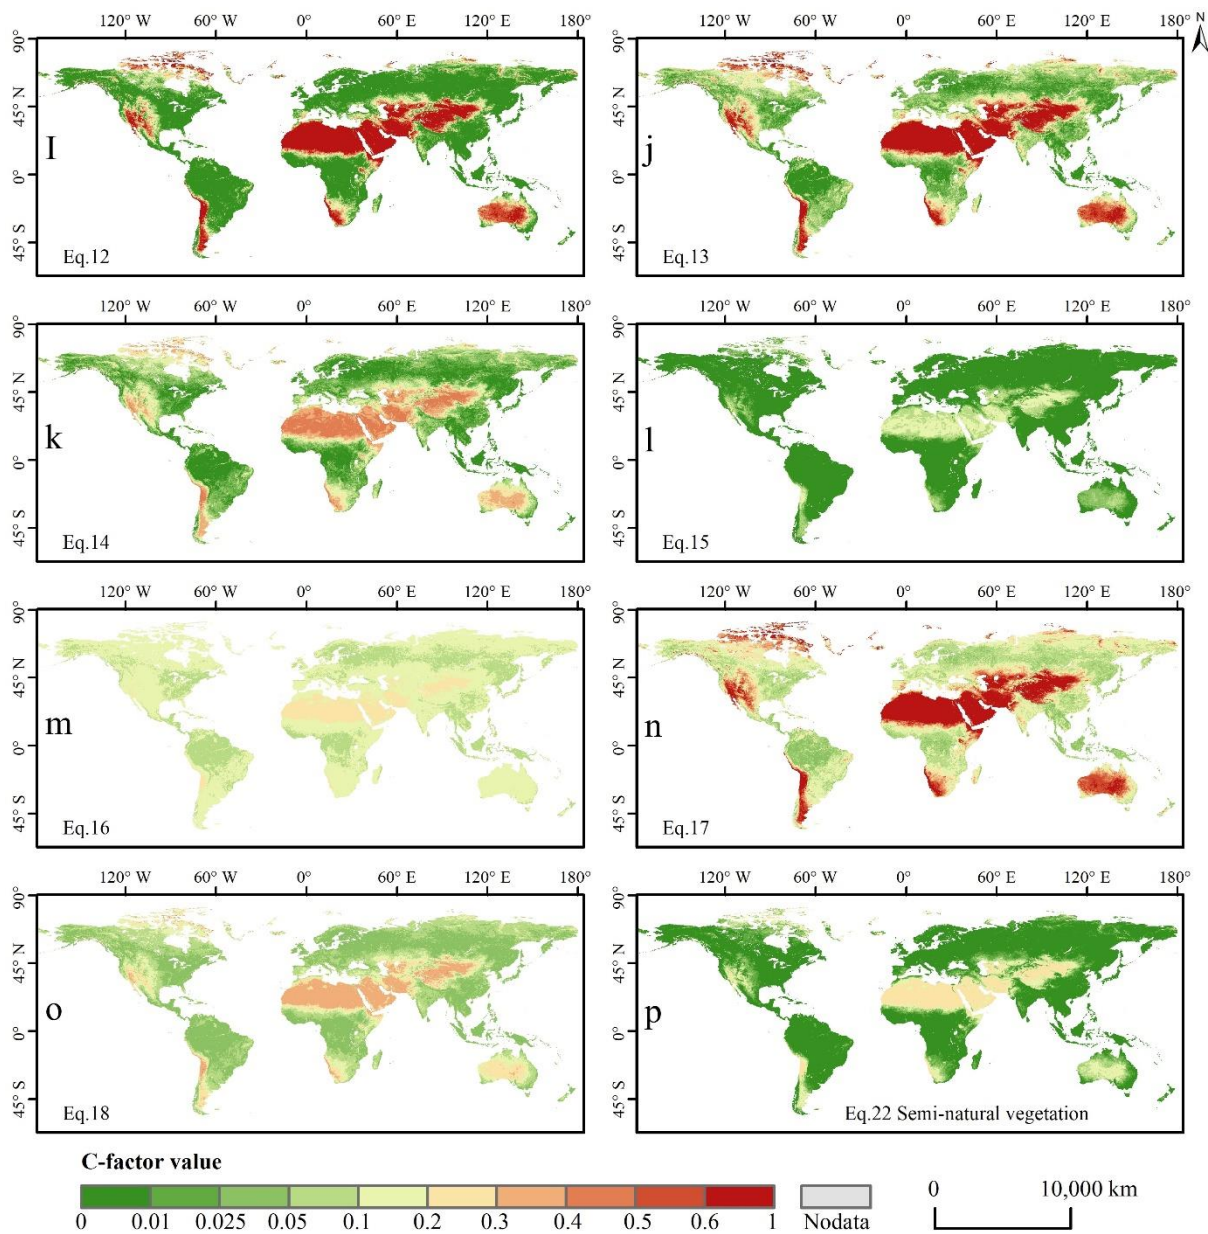



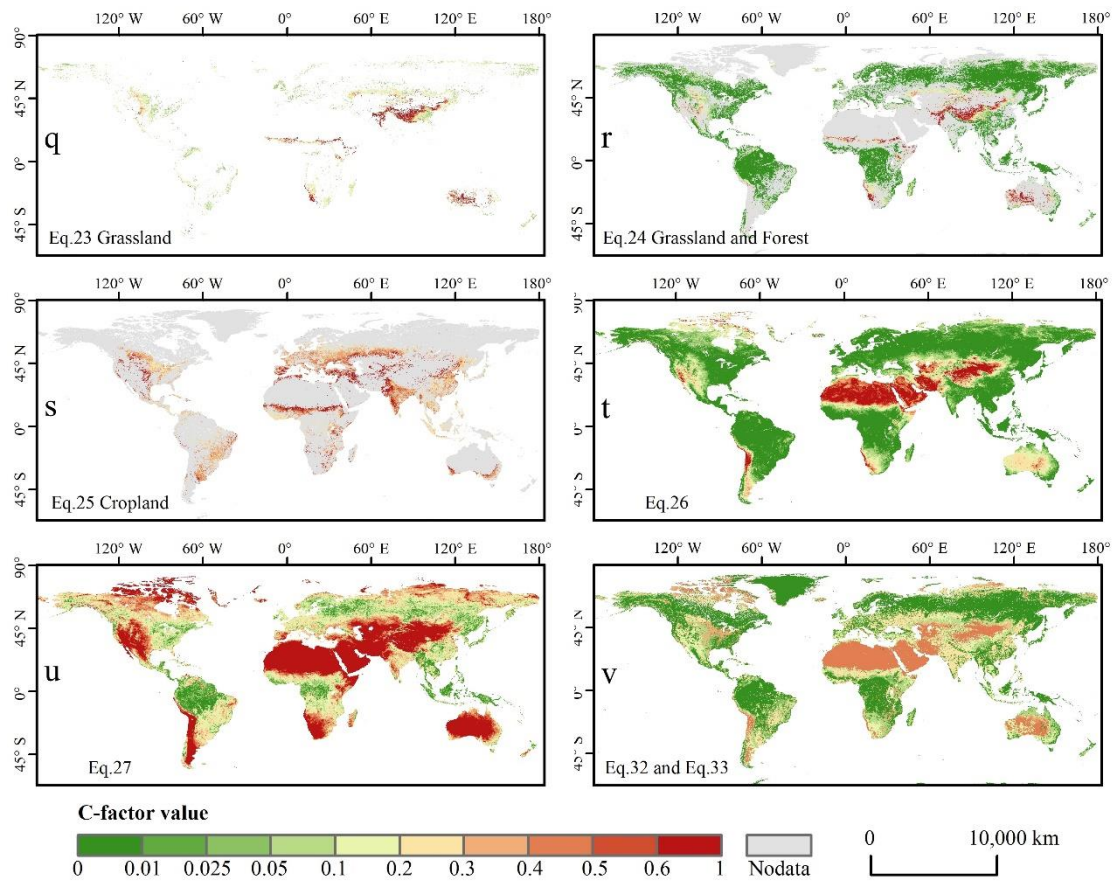

**Figure S2** Spatial distribution of C-factor values according to equations. (a) Eq.4; (b) Eq.5; (c) Eq.6; (d) Eq.7; (e) Eq.8; (f) Eq.9; (g) Eq.10; (h) Eq.11; (i) Eq.12; (j) Eq.13; (k) Eq.14; (l) Eq.15; (m) Eq.16; (n) Eq.17; (o) Eq.18; (p) Eq.22; (q) Eq.23; (r) Eq.24; (s) Eq.25; (t) Eq.26; (u) Eq.27; (v) Eq.32 and Eq.33.

**Table S1** Mean and standard deviation (SD) for C-factor value per land use type.

|       | Cropland |        | Forest |        | Grassland |        | Shrubland |        | Sparse vegetation |        |
|-------|----------|--------|--------|--------|-----------|--------|-----------|--------|-------------------|--------|
|       | Mean     | SD     | Mean   | SD     | Mean      | SD     | Mean      | SD     | Mean              | SD     |
| Eq.4  | 0.0152   | 0.0487 | 0.0022 | 0.0176 | 0.0818    | 0.1123 | 0.0719    | 0.106  | 0.1219            | 0.1153 |
| Eq.5  | 0.1852   | 0.1794 | 0.0718 | 0.1102 | 0.3817    | 0.273  | 0.356     | 0.2644 | 0.5133            | 0.2274 |
| Eq.6  | 0.005    | 0.0465 | 0.0004 | 0.013  | 0.0657    | 0.1749 | 0.0522    | 0.1499 | 0.0859            | 0.184  |
| Eq.7  | 0.1272   | 0.1592 | 0.0399 | 0.0857 | 0.308     | 0.2546 | 0.2826    | 0.2475 | 0.4288            | 0.218  |
| Eq.8  | 0.1512   | 0.0788 | 0.0951 | 0.0564 | 0.235     | 0.1147 | 0.2242    | 0.1114 | 0.2906            | 0.0942 |
| Eq.9  | 0.0331   | 0.0628 | 0.007  | 0.0275 | 0.1108    | 0.1147 | 0.0988    | 0.1111 | 0.1606            | 0.1069 |
| Eq.10 | 0.0736   | 0.1551 | 0.014  | 0.0649 | 0.2699    | 0.2953 | 0.2396    | 0.2853 | 0.3937            | 0.2824 |
| Eq.11 | 0.0151   | 0.0079 | 0.0095 | 0.0056 | 0.0235    | 0.0115 | 0.0224    | 0.0111 | 0.0291            | 0.0094 |
| Eq.12 | 0.051    | 0.1115 | 0.0105 | 0.0439 | 0.2037    | 0.2444 | 0.1801    | 0.2315 | 0.297             | 0.2418 |
| Eq.13 | 0.0998   | 0.1193 | 0.039  | 0.058  | 0.2536    | 0.231  | 0.2309    | 0.2199 | 0.3503            | 0.2161 |
| Eq.14 | 0.0554   | 0.0652 | 0.0215 | 0.0323 | 0.1383    | 0.123  | 0.1262    | 0.1177 | 0.1909            | 0.1143 |
| Eq.15 | 0.0034   | 0.0086 | 0.001  | 0.0029 | 0.0165    | 0.0266 | 0.014     | 0.0231 | 0.023             | 0.027  |
| Eq.16 | 0.1147   | 0.0196 | 0.1019 | 0.0125 | 0.1374    | 0.0321 | 0.1343    | 0.0309 | 0.1521            | 0.028  |
| Eq.17 | 0.1647   | 0.1129 | 0.0969 | 0.0649 | 0.3015    | 0.1975 | 0.2823    | 0.1893 | 0.3892            | 0.1774 |
| Eq.18 | 0.0669   | 0.0409 | 0.0454 | 0.0205 | 0.1213    | 0.0844 | 0.1131    | 0.0792 | 0.1545            | 0.08   |
| Eq.22 | --       | --     | 0.0039 | 0.0076 | 0.0425    | 0.0593 | 0.037     | 0.0537 | 0.0594            | 0.0601 |
| Eq.23 | 0.1093   | 0.1079 | 0.061  | 0.0469 | 0.2605    | 0.2484 | 0.2369    | 0.2316 | 0.3495            | 0.2437 |
| Eq.24 | --       | --     | 0.0096 | 0.0469 | 0.2587    | 0.2858 | --        | --     | --                | --     |
| Eq.25 | 0.4337   | 0.1814 | --     | --     | --        | --     | --        | --     | --                | --     |
| Eq.26 | 0.0276   | 0.0568 | 0.0065 | 0.0222 | 0.1108    | 0.1664 | 0.0934    | 0.1388 | 0.1529            | 0.1617 |

|       |        |        |        |        |        |        |        |        |        |        |
|-------|--------|--------|--------|--------|--------|--------|--------|--------|--------|--------|
| Eq.27 | 0.2749 | 0.1905 | 0.1404 | 0.1339 | 0.4778 | 0.2778 | 0.4521 | 0.2698 | 0.6128 | 0.2282 |
| Eq.32 | --     | --     | 0.0005 | 0.0004 | 0.0769 | 0.0389 | 0.0733 | 0.0378 | 0.3451 | 0.0913 |
| Eq.33 | 0.0152 | 0.0487 | 0.0022 | 0.0176 | 0.0818 | 0.1123 | 0.0719 | 0.106  | 0.1219 | 0.1153 |
